# Supplementary material for: Mechanism of action of an Ir(iii) complex bearing a boronic acid active as a H2O2-responsive photosensitizer: ROS generation and quinone methide release for GSH scavenging
Source: Royal Society of Chemistry journal article supplement (doi:10.1039/d3qi00203a), 2023-01-01
Supplement: d3qi00203a1.pdf [file d3qi00203a1.pdf]

## Electronic Supplementary Information

# Mechanism of action of an Ir(III) Complex Bearing a Boronic Acid Active as H<sub>2</sub>O<sub>2</sub>-Responsive Photosensitizer: ROS Generation and Quinone Release for GSH Scavenging

Pierraffaele Barretta, Gloria Mazzone\*

Department of Chemistry and Chemical Technologies, University of Calabria, 87036 Rende (CS), Italy.

### Table of Contents

- **Figure S1.** Optimized structures of the minima intercepted along both a) neutral and b) anion pathways. -S2-
- **Figure S2.** Free energy profiles in water describing the GSH alkylation by QM computed at B3LYP/6-31G(d,p) level of theory. The optimized structures of adduct, TS and product are included. -S3-
- **Figure S3.** Intrinsic reaction coordinate (IRC) calculation of TS'' in the forward direction leading to product formation. -S4-
- **Table S1.** Benchmark of exchange and correlation functional on the maximum absorption wavelength in water,  $\lambda_{\text{max}}$  in nm, for **Ir-OH** employing the 6-311G(d,p) basis set for C, N, H, O and the pseudopotential with its split-valence basis set SDD for Ir atom. Oscillator strength (*f*) is also reported. -S5-
- **Table S2.** Benchmark of basis set on the maximum absorption wavelength in water,  $\lambda_{\text{max}}$  in nm, for **Ir-OH**. Oscillator strength (*f*) is also reported. -S5-
- Discussion on benchmark -S6-
- **Table S3.** Excitation energies ( $\Delta E$ , eV), absorption wavelength ( $\lambda$ , nm), oscillator strength (*f*), MO contribution (%) for Ir(III) complexes, **Ir-B(OH)<sub>2</sub>** and **Ir-OH**. -S7-
- **Figure S4.** Computed UV-Vis spectra of the studied species, in water, at the PBE0/6-311G(d,p)/SDD level of theory. The convolution of the spectra was accomplished with a half-width of 0.27 eV. -S8-
- **Table S4.** Lowest triplet states excitation energies ( $\Delta E$ , eV), MO contribution (%) and Theoretical Assignment for the investigated Ir(III) complexes. -S9-
- **Figure S5.** NTOs of bright and triplet states computed for **Ir-B(OH)<sub>2</sub>**. -S10-
- **References** -S11-

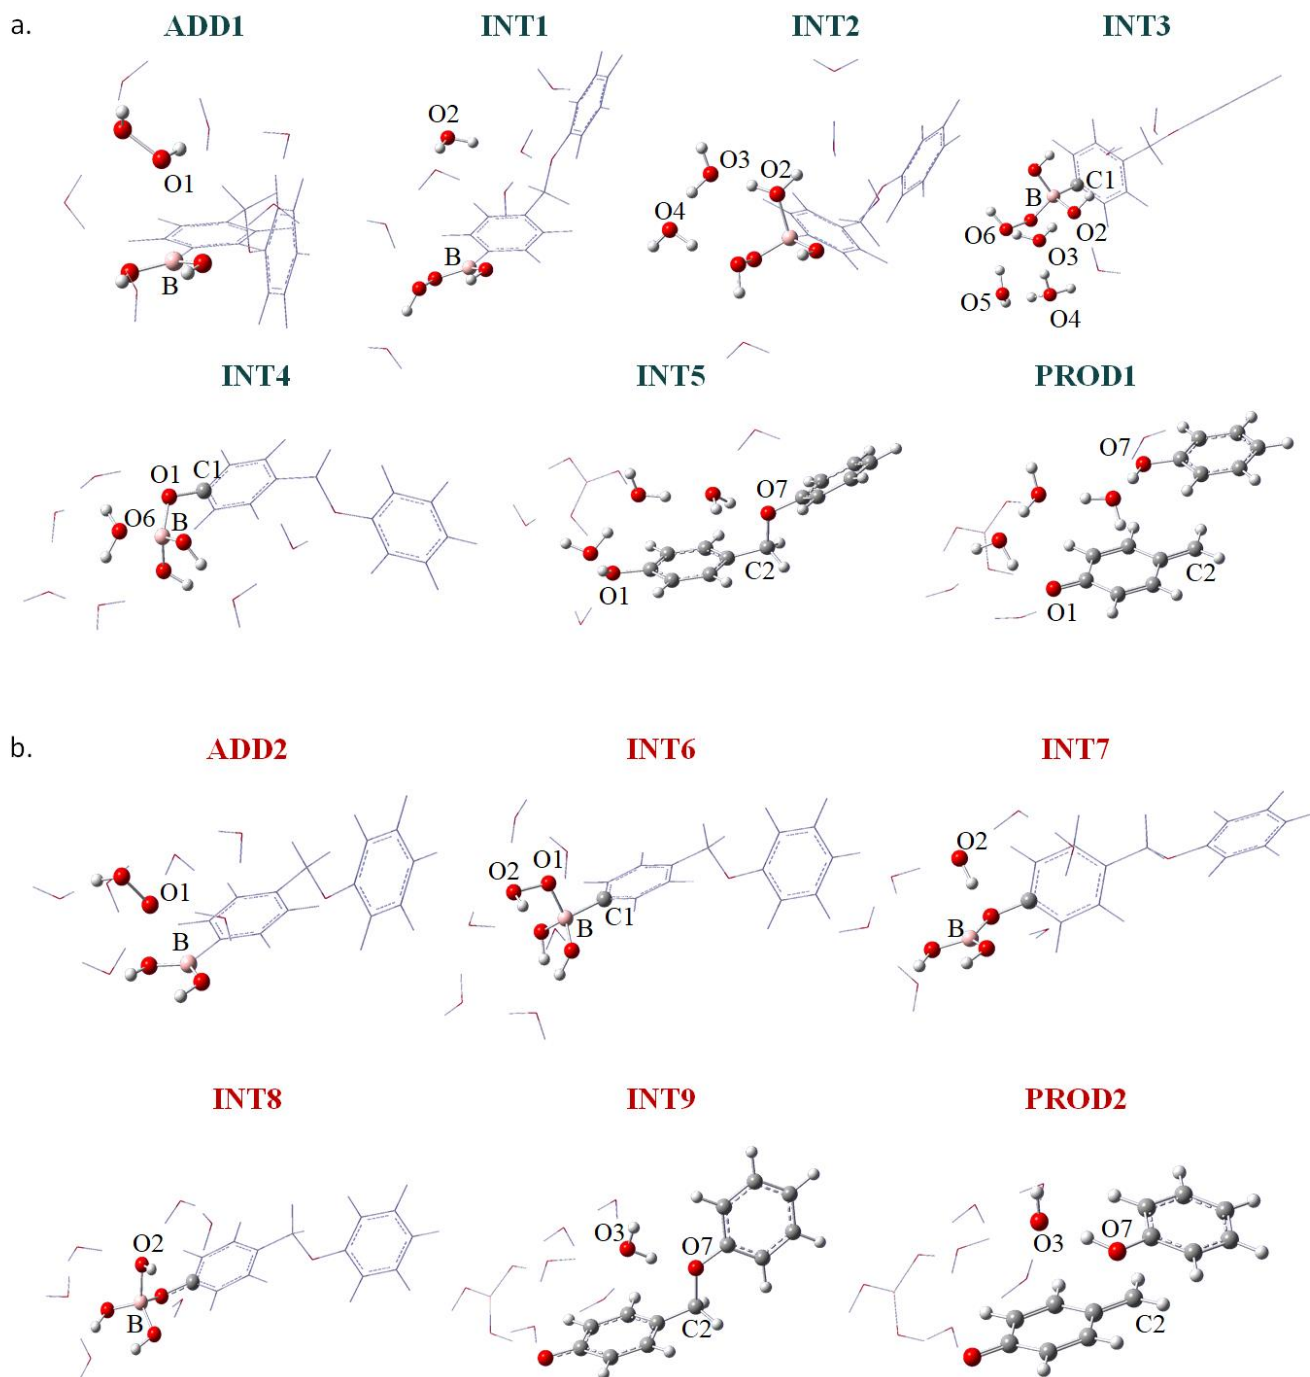

**Figure S1.** Optimized structures of the minima intercepted along both a) neutral and b) anion pathways.

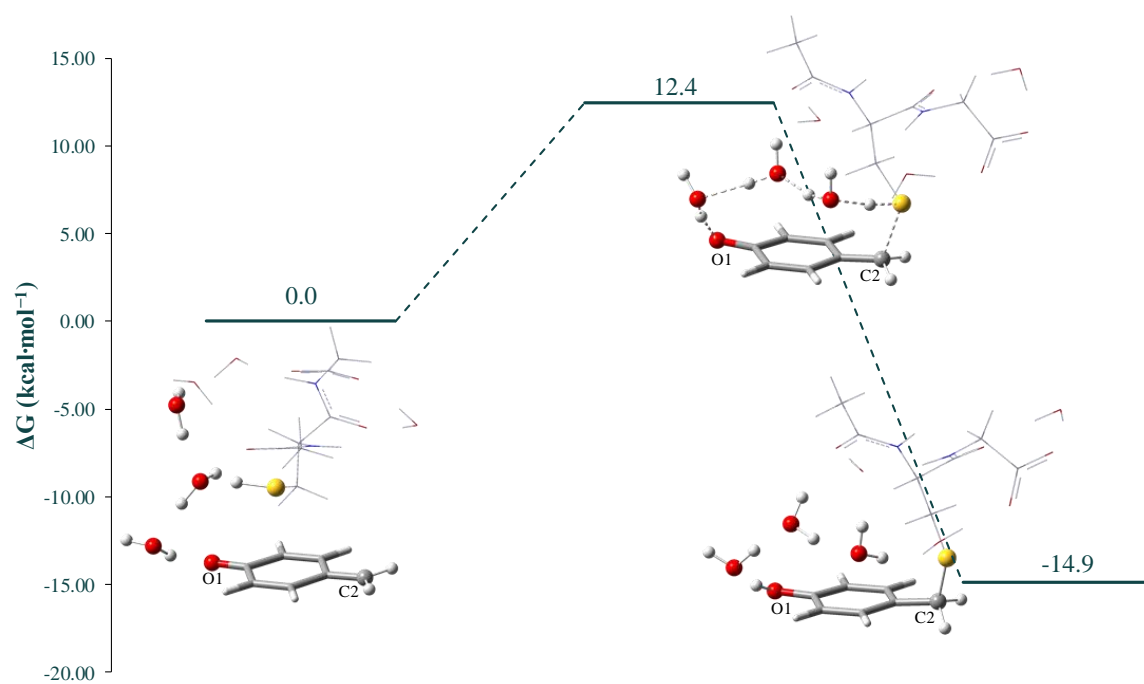

**Figure S2.** Free energy profiles in water describing the GSH alkylation by QM computed at B3LYP/6-31G(d,p) level of theory. The optimized structures of adduct, TS and product are included.

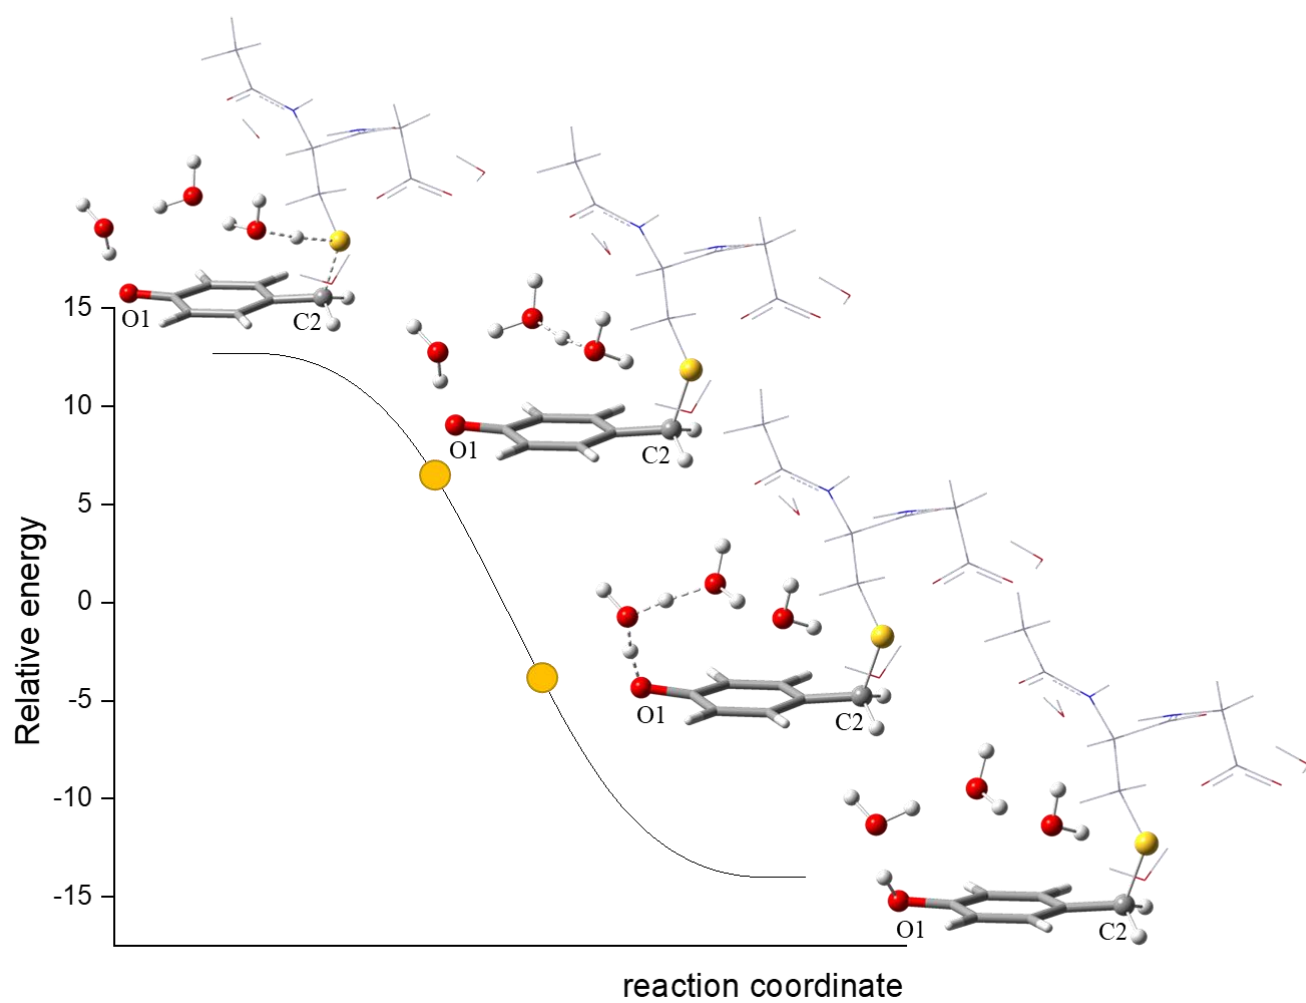

**Figure S3.** Intrinsic reaction coordinate calculation of TS'' in the forward direction leading to product formation.

**Table S1.** Benchmark of exchange and correlation functional on the maximum absorption wavelength in water,  $\lambda_{\text{max}}$  in nm, for **Ir-OH** employing the 6-311G(d) basis set for C, N, H, O and the pseudopotential with its split-valence basis set SDD for Ir atom. Oscillator strength ( $f$ ) is also reported.

|                  | $\lambda_{\text{max}}$ (nm) | $f$   | $\Delta$ |
|------------------|-----------------------------|-------|----------|
| <i>Exp</i>       | 405                         |       |          |
| <b>B97D</b>      | 599.3                       | 0.011 | 194.3    |
| <b>PBE</b>       | 608.4                       | 0.012 | 203.4    |
| <b>B3LYP</b>     | 462.3                       | 0.023 | 57.3     |
| <b>B3PW91</b>    | 461.0                       | 0.023 | 56.0     |
| <b>PBE0</b>      | 433.0                       | 0.030 | 28.0     |
| <b>M06L</b>      | 554.6                       | 0.013 | 149.6    |
| <b>CAM-B3LYP</b> | 351.7                       | 0.161 | -53.3    |
| <b>WB97XD</b>    | 347.3                       | 0.159 | -57.7    |
| <b>LC-WHPBE</b>  | 312.4                       | 0.315 | -92.6    |
| <b>M06</b>       | 450.8                       | 0.023 | 45.8     |
| <b>M11</b>       | 315.6                       | 0.329 | -89.4    |
| <b>MN15</b>      | 382.5                       | 0.070 | -22.5    |
| <b>MN15L</b>     | 497.2                       | 0.017 | 92.2     |
| <b>MN12L</b>     | 502.0                       | 0.022 | 97.0     |
| <b>N12</b>       | 612.1                       | 0.011 | 207.1    |
| <b>TPSS</b>      | 576.0                       | 0.014 | 171.0    |
| <b>M08HX</b>     | 341.8                       | 0.220 | -63.2    |

**Table S2.** Benchmark of exchange and correlation functional on the maximum absorption wavelength in water,  $\lambda_{\text{max}}$  in nm, for **Ir-OH** employing the 6-311G(d,p) basis set for C, N, H, O and the pseudopotential with its split-valence basis set SDD for Ir atom. Oscillator strength ( $f$ ) is also reported.

|                          | $\lambda_{\text{max}}$ (nm) | $f$   | $\Delta$ |
|--------------------------|-----------------------------|-------|----------|
| <b>6-311G(d,p)</b>       | 433.0                       | 0.030 | 28.0     |
| <b>6-311+G(d,p)</b>      | 434.2                       | 0.029 | 29.2     |
| <b>6-311++G(d,p)</b>     | 434.2                       | 0.029 | 29.2     |
| <b>6-311++G(3df,2pd)</b> | 436.3                       | 0.029 | 31.3     |

## Discussion on benchmark

The exchange and correlation functionals used for reproducing the maximum absorption wavelength of **Ir-OH** complex are of different type: the GGA (general gradient approximation) functionals B97D<sup>1</sup>, and PBE<sup>2,3</sup>, the metaNGA (nonseparable gradient approximations) MN15<sup>4</sup> and N12<sup>5</sup>, the meta-GGA M06L<sup>6</sup>, MN15L<sup>7</sup> and MN12L<sup>8</sup>, the global-hybrid GGA B3LYP<sup>9,10</sup>, PBE0<sup>11</sup>, M08-HX<sup>12</sup> and B3PW91<sup>13</sup>, the global-hybrid meta-GGA M06<sup>14</sup>, M11<sup>15</sup> and TPSS<sup>16</sup> and the range-separated hybrid GGA LC-WHPBE<sup>17</sup>, CAM-B3LYP<sup>18</sup> and  $\omega$ B97XD<sup>19</sup>. From data reported in Table S1 it can be inferred that some functionals strongly failed in reproducing the  $\lambda_{\text{max}}$ , see for instance N12 or B97D. While hybrid functionals like B3LYP and B3PW91 essentially give the same results, overestimating the  $\lambda_{\text{max}}$  by approximately 50 nm, PBE0 is one of the functional that better simulate such property. The range separated functionals underestimate it by about 50 nm, again the exception is for a functional belonging to the PBE family, that is the LC-wHPBE that fails in reproducing. Even the Minnesota functionals return very diversified results; while the metaNGA MN15 reproduces the  $\lambda_{\text{max}}$  with an error of 22.5 nm, a severe overestimation (M06, M06L, MN15L, MN12L, N12) or underestimation (M11) has been found employing the others. However, the result of the benchmark study returns the hybrid functionals MN15 and PBE0 as the most suitable in reproducing one of the main properties for PDT application. In particular, while MN15 underestimates of 22 nm the recorded wavelength, PBE0 reproduces the  $\lambda_{\text{max}}$  with an error of 28 nm.

Hence, once fixed the exchange and correlation functional, the influence of the basis set size has been checked as well. In particular, one and two diffuse functions have been added first, and then d-type functions has been added to the basis set with valence p orbitals, and f-functions to the basis set with d-type orbitals (Table S2). However, the outcomes confirm that 6-311G\*\* basis set is enough accurate in reproducing the maximum experimental absorption wavelength of 405 nm, as with the other basis sets a slight red-shift of the  $\lambda$  has been observed.

**Table S3.** Excitation energies ( $\Delta E$ , eV), absorption wavelength ( $\lambda$ , nm), oscillator strength ( $f$ ), MO contribution (%), MO contribution (%), MO contribution (%) for Ir(III) complexes, Ir-B(OH)<sub>2</sub> and Ir-OH.

| Complex               | $\Delta E$ | $\lambda$ | $f^a$ | MO contribution                                                                                             | Theoretical Assignment                | $\lambda^{\text{exp}}$ |
|-----------------------|------------|-----------|-------|-------------------------------------------------------------------------------------------------------------|---------------------------------------|------------------------|
| Ir-B(OH) <sub>2</sub> | 2.86       | 433       | 0.032 | H $\rightarrow$ L 85%                                                                                       | ML <sub>1</sub> CT/LL <sub>1</sub> CT | 405 <sup>b</sup>       |
|                       | 3.55       | 350       | 0.181 | H-3 $\rightarrow$ L 39%; H-4 $\rightarrow$ L 15%;<br>H-1 $\rightarrow$ L+1 15%                              | LL <sub>1</sub> CT/ML <sub>1</sub> CT |                        |
|                       | 4.08       | 304       | 0.383 | H-1 $\rightarrow$ L+4 29%; H-1 $\rightarrow$ L+3 26%                                                        | L <sub>1</sub> LCT/IL <sub>1</sub> CT |                        |
|                       | 4.11       | 302       | 0.315 | H-1 $\rightarrow$ L+4 39%; H-1 $\rightarrow$ L+3 23%                                                        | L <sub>1</sub> LCT/IL <sub>1</sub> CT |                        |
|                       | 4.20       | 296       | 0.152 | H $\rightarrow$ L+5 18%; H-3 $\rightarrow$ L+2 11%;<br>H-1 $\rightarrow$ L+2 10%; H-1 $\rightarrow$ L+4 10% | MLCT/IL <sub>1</sub> CT               |                        |
|                       | 4.34       | 286       | 0.105 | H-9 $\rightarrow$ L 31%; H-5 $\rightarrow$ L+1 27%                                                          | ML <sub>1</sub> CT/IL <sub>1</sub> CT |                        |
|                       | 4.50       | 275       | 0.166 | H-5 $\rightarrow$ L+2 46%; H-2 $\rightarrow$ L+5 12%                                                        | MLCT/ILCT                             |                        |
|                       | 4.52       | 274       | 0.136 | H-13 $\rightarrow$ L 32%; H-11 $\rightarrow$ L 13%;<br>H-5 $\rightarrow$ L+2 10%                            | ML <sub>1</sub> CT/LL <sub>1</sub> CT |                        |
|                       | 4.62       | 268       | 0.542 | H-9 $\rightarrow$ L+1 35%; H-6 $\rightarrow$ L+1 13%                                                        | IL <sub>1</sub> CT/ML <sub>1</sub> CT |                        |
|                       | 4.73       | 262       | 0.171 | H-3 $\rightarrow$ L+4 11%; H-12 $\rightarrow$ L 10%                                                         | ML <sub>1</sub> CT/LL <sub>1</sub> CT |                        |
| Ir-OH                 | 2.86       | 433       | 0.030 | H $\rightarrow$ L 89%                                                                                       | ML <sub>1</sub> CT/LL <sub>1</sub> CT | 405 <sup>b</sup>       |
|                       | 3.55       | 349       | 0.170 | H-3 $\rightarrow$ L 30%; H-1 $\rightarrow$ L+1 29%;<br>H-4 $\rightarrow$ L 11%                              | ML <sub>1</sub> CT/LL <sub>1</sub> CT |                        |
|                       | 4.10       | 303       | 0.112 | H-1 $\rightarrow$ L+3 42%; H-2 $\rightarrow$ L+3 10%                                                        | MLCT/L <sub>1</sub> LCT               |                        |
|                       | 4.13       | 300       | 0.310 | H-1 $\rightarrow$ L+4 53%; H $\rightarrow$ L+5 11%                                                          | ML <sub>1</sub> CT/IL <sub>1</sub> CT |                        |
|                       | 4.21       | 295       | 0.188 | H $\rightarrow$ L+5 17%; H-3 $\rightarrow$ L+2 12%;<br>H-1 $\rightarrow$ L+2 12%; H-1 $\rightarrow$ L+4 12% | ML <sub>1</sub> CT/LL <sub>1</sub> CT |                        |
|                       | 4.35       | 285       | 0.109 | H-7 $\rightarrow$ L 33%; H-5 $\rightarrow$ L+1 20%                                                          | ML <sub>1</sub> CT/IL <sub>1</sub> CT |                        |
|                       | 4.50       | 275       | 0.157 | H-5 $\rightarrow$ L+2 45%; H-2 $\rightarrow$ L+5 12%                                                        | ILCT/LMCT                             |                        |
|                       | 4.52       | 274       | 0.110 | H-11 $\rightarrow$ L 32%; H-9 $\rightarrow$ L 15%;<br>H-12 $\rightarrow$ L 10%                              | LL <sub>1</sub> CT/ML <sub>1</sub> CT |                        |
|                       | 4.65       | 267       | 0.457 | H-7 $\rightarrow$ L+1 43%; H-11 $\rightarrow$ L 10%;<br>H-10 $\rightarrow$ L 10%                            | IL <sub>1</sub> CT/ML <sub>1</sub> CT |                        |
|                       | 4.74       | 261       | 0.157 | H-6 $\rightarrow$ L+1 18%; H-7 $\rightarrow$ L+1 13%;<br>H-1 $\rightarrow$ L+6 13%                          | IL <sub>1</sub> CT/ML <sub>1</sub> CT |                        |

a. Only vertical transition with  $f$  greater than 0.1 are reported, with the exception of the most red-shifted transition. b. from <sup>20</sup>.

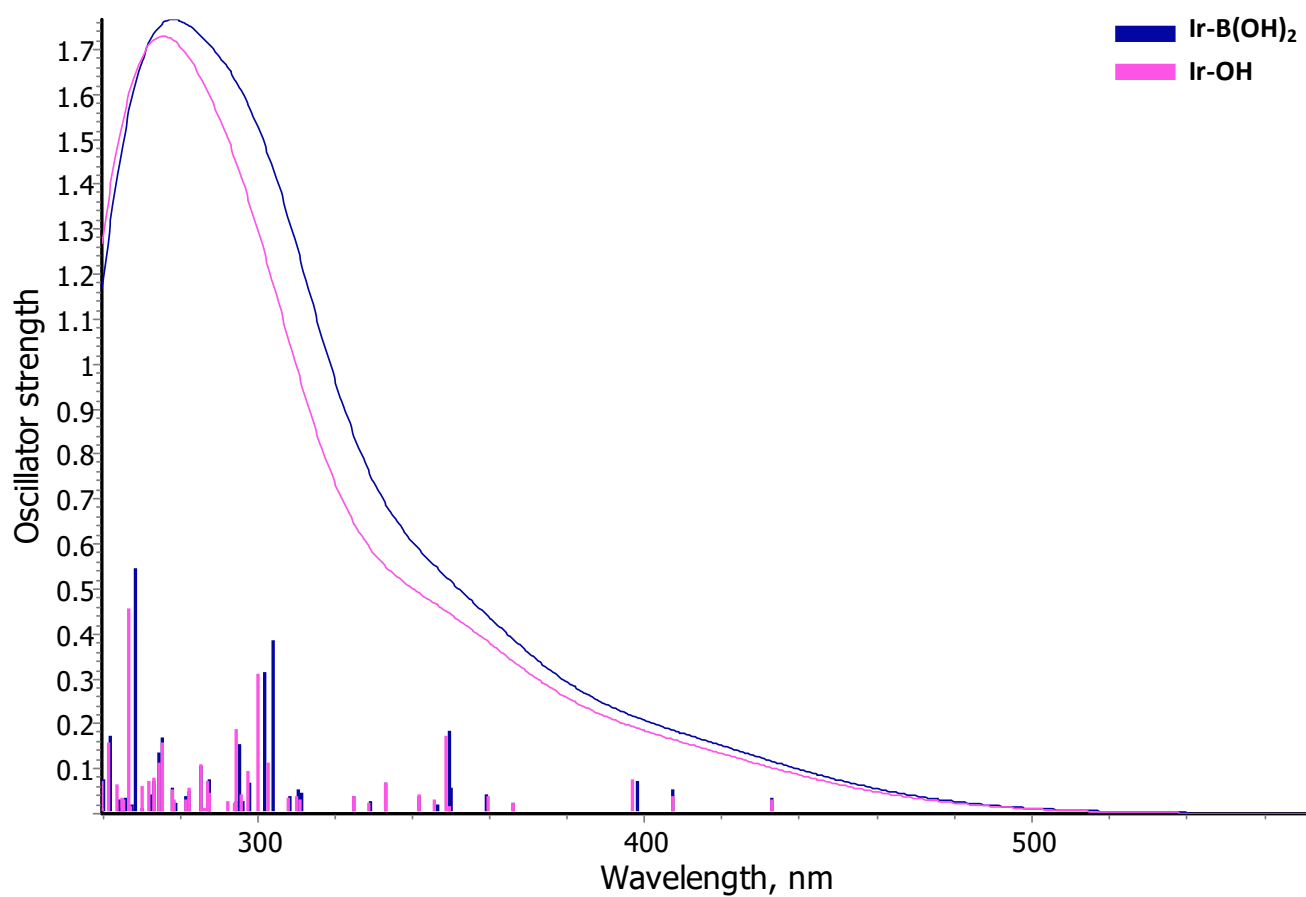

**Figure S4.** Computed UV-Vis spectra of the studied species, in water, at the PBE0/6-311G(d,p)/SDD level of theory. The convolution of the spectra was accomplished with a half-width of 0.27 eV.

**Table S4.** Lowest triplet states excitation energies ( $\Delta E$ , eV), MO contribution (%) and Theoretical Assignment for the investigated Ir(III) complexes.

| Complex                     | State | $\Delta E$ | MO contribution                                                               | Theoretical Assignment |
|-----------------------------|-------|------------|-------------------------------------------------------------------------------|------------------------|
| <b>Ir-B(OH)<sub>2</sub></b> | T1    | 2.59       | H-1 $\rightarrow$ L+1 26%; H $\rightarrow$ L 18%; H $\rightarrow$ L+1 17%     | IL <sub>1</sub> CT/MC  |
|                             | T2    | 2.63       | H $\rightarrow$ L 43%; H-1 $\rightarrow$ L 29%                                | IL <sub>1</sub> CT/MC  |
|                             | T3    | 2.77       | H $\rightarrow$ L+2 35%; H-1 $\rightarrow$ L+2 11%; H-4 $\rightarrow$ L+2 10% | ILCT/MC                |
|                             | T4    | 2.83       | H-1 $\rightarrow$ L 44%; H $\rightarrow$ L 23%                                | LL <sub>1</sub> CT/MC  |
|                             | T5    | 2.84       | H-2 $\rightarrow$ L+3 28%; H-3 $\rightarrow$ L+3 15%                          | ILCT/MC                |
| <b>Ir-OH</b>                | T1    | 2.59       | H-1 $\rightarrow$ L+1 29%; H $\rightarrow$ L 19%; H $\rightarrow$ L+1 13%     | IL <sub>1</sub> CT/MC  |
|                             | T2    | 2.63       | H $\rightarrow$ L 38%; H-1 $\rightarrow$ L 35%                                | IL <sub>1</sub> CT/MC  |
|                             | T3    | 2.77       | H $\rightarrow$ L+2 40%; H-4 $\rightarrow$ L+2 11%                            | ILCT/MC                |
|                             | T4    | 2.83       | H-1 $\rightarrow$ L 39%; H $\rightarrow$ L 27%                                | LL <sub>1</sub> CT/MC  |
|                             | T5    | 2.84       | H-2 $\rightarrow$ L+3 25%; H-3 $\rightarrow$ L+3 14%                          | ILCT/MC                |

|       | <i>hole</i>                                                                         | <i>particle</i>                                                                      | <i>character</i>                      |
|-------|-------------------------------------------------------------------------------------|--------------------------------------------------------------------------------------|---------------------------------------|
| $S_1$ | 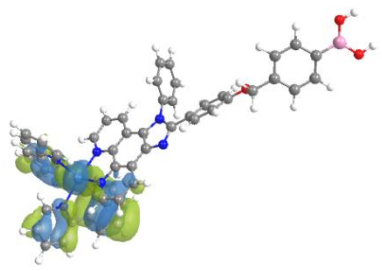   | 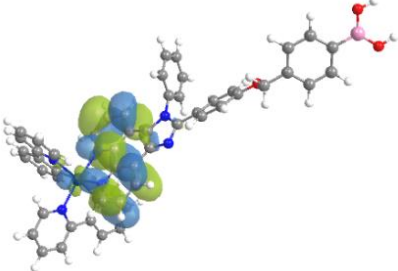   | LL <sub>1</sub> CT/ML <sub>1</sub> CT |
| $T_1$ | 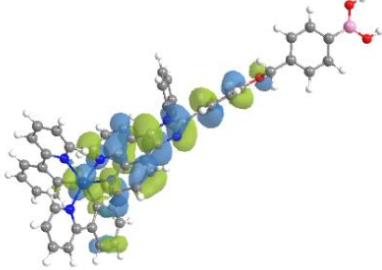   | 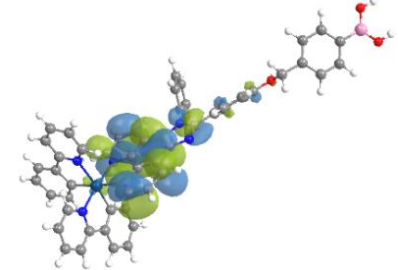   | IL <sub>1</sub> CT/MC                 |
| $T_2$ | 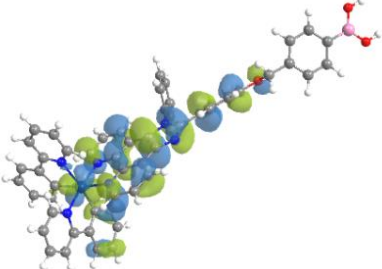  | 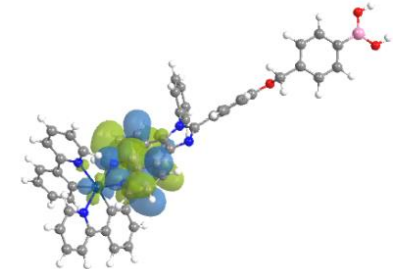  | IL <sub>1</sub> CT/MC                 |
| $T_3$ | 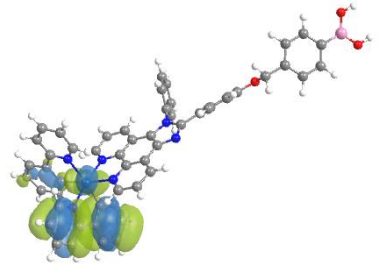 | 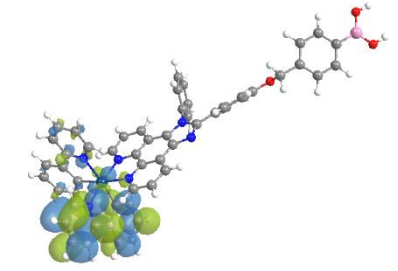 | ILCT/MC                               |
| $T_4$ | 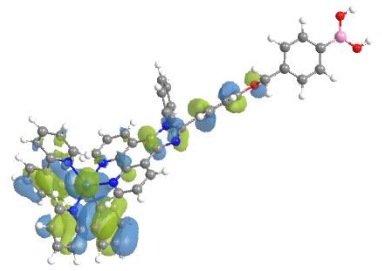 | 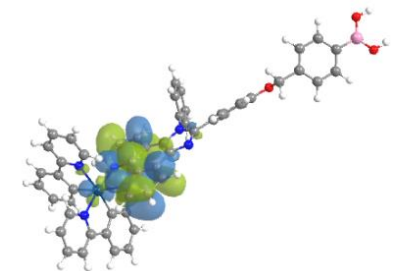 | LL <sub>1</sub> CT/MC                 |
| $T_5$ | 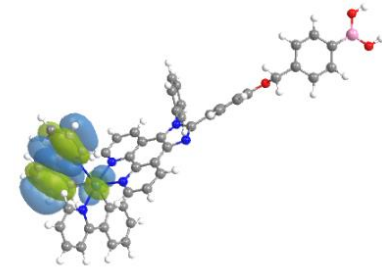 | 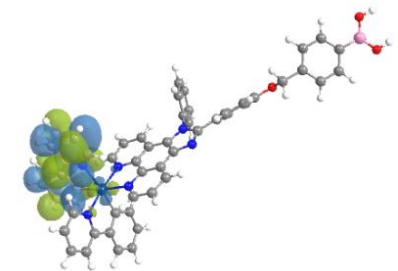 | ILCT/MC                               |

**Figure S5.** NTOs of the bright and triplet states computed for Ir-B(OH)<sub>2</sub>.

## References

- 1 S. Grimme, Semiempirical GGA-type density functional constructed with a long-range dispersion correction, *J. Comput. Chem.*, 2006, **27**, 1787–1799.
- 2 J. P. Perdew, K. Burke and M. Ernzerhof, Generalized Gradient Approximation Made Simple, *Phys. Rev. Lett.*, 1996, **77**, 3865.
- 3 J. P. Perdew, K. Burke and M. Ernzerhof, Generalized Gradient Approximation Made Simple [Phys. Rev. Lett. 77, 3865 (1996)], *Phys. Rev. Lett.*, 1997, **78**, 1396.
- 4 H. S. Yu, X. He, S. L. Li and D. G. Truhlar, MN15: A Kohn–Sham global-hybrid exchange–correlation density functional with broad accuracy for multi-reference and single-reference systems and noncovalent interactions, *Chem. Sci.*, 2016, **7**, 5032.
- 5 R. Peverati and D. G. Truhlar, Exchange-correlation functional with good accuracy for both structural and energetic properties while depending only on the density and its gradient, *J. Chem. Theory Comput.*, 2012, **8**, 2310–2319.
- 6 Y. Zhao and D. G. Truhlar, A new local density functional for main-group thermochemistry, transition metal bonding, thermochemical kinetics, and noncovalent interactions, *J. Chem. Phys.*, 2006, **125**, 194101.
- 7 H. S. Yu, X. He and D. G. Truhlar, MN15-L: A New Local Exchange-Correlation Functional for Kohn-Sham Density Functional Theory with Broad Accuracy for Atoms, Molecules, and Solids, *J. Chem. Theory Comput.*, 2016, **12**, 1280–1293.
- 8 R. Peverati and D. G. Truhlar, An improved and broadly accurate local approximation to the exchange–correlation density functional: The MN12-L functional for electronic structure calculations in chemistry and physics, *Phys. Chem. Chem. Phys.*, 2012, **14**, 13171–13174.
- 9 A. D. Becke, Density-functional thermochemistry. III. The role of exact exchange, *J. Chem. Phys.*, 1998, **98**, 5648.
- 10 C. Lee, W. Yang and R. G. Parr, Development of the Colle-Salvetti correlation-energy formula into a functional of the electron density, *Phys. Rev. B*, 1988, **37**, 785.
- 11 C. Adamo and V. Barone, Toward reliable density functional methods without adjustable parameters: The PBE0 model, *J. Chem. Phys.*, 1999, **110**, 6158.
- 12 Y. Zhao and D. G. Truhlar, Exploring the limit of accuracy of the global hybrid meta density functional for main-group thermochemistry, kinetics, and noncovalent interactions, *J. Chem. Theory Comput.*, 2008, **4**, 1849–1868.
- 13 J. P. Perdew and K. Burke, Generalized gradient approximation for the exchange-correlation hole of a many-electron system, *Phys. Rev. B*, 1996, **54**, 16533.
- 14 Y. Zhao and D. G. Truhlar, The M06 suite of density functionals for main group thermochemistry, thermochemical kinetics, noncovalent interactions, excited states, and transition elements: two new functionals and systematic testing of four M06-class functionals and 12 other function, *Theor. Chem. Acc.*, 2008, **120**, 215–241.
- 15 R. Peverati and D. G. Truhlar, Improving the accuracy of hybrid meta-GGA density functionals by range separation, *J. Phys. Chem. Lett.*, 2011, **2**, 2810–2817.
- 16 J. Tao, J. P. Perdew, V. N. Staroverov and G. E. Scuseria, Climbing the density functional ladder: Nonempirical meta–generalized gradient approximation designed for molecules and solids, *Phys. Rev. Lett.*, 2003, **91**, 146401.
- 17 O. A. Vydrov and G. E. Scuseria, Assessment of a long-range corrected hybrid functional, *J. Chem. Phys.*, 2006, **125**, 234109.
- 18 T. Yanai, D. P. Tew and N. C. Handy, A new hybrid exchange–correlation functional using the Coulomb-attenuating method (CAM-B3LYP), *Chem. Phys. Lett.*, 2004, **393**, 51–57.
- 19 J. Da Chai and M. Head-Gordon, Long-range corrected hybrid density functionals with damped atom–atom

dispersion corrections, *Phys. Chem. Chem. Phys.*, 2008, **10**, 6615–6620.

- 20 X. Liao, J. Shen, W. Wu, S. Kuang, M. Lin, J. Karges, Z. Tang and H. Chao, A mitochondrial-targeting iridium(III) complex for H<sub>2</sub>O<sub>2</sub>-responsive and oxidative stress amplified two-photon photodynamic therapy, *Inorg. Chem. Front.*, 2021, **8**, 5045–5053.
